# Supplementary material for: An mRNA-Based Multiple Antigenic Gene Expression System Delivered by Engineered Salmonella for Severe Fever with Thrombocytopenia Syndrome and Assessment of Its Immunogenicity and Protection Using a Human DC-SIGN-Transduced Mouse Model
Source: MDPI journal article supplement (doi:10.3390/pharmaceutics15051339), 2023-04-26
Supplement: s1 [file s1]

## Supporting Information

Ji-Young Park<sup>1</sup>, Chamith Hewawaduge<sup>1</sup>, Khristine Kaith S. Lloren<sup>1</sup>, Byungkwan Oh<sup>2</sup>, Mi Young So<sup>1</sup>, John Hwa Lee<sup>1,\*</sup>

<sup>1</sup> Department of Veterinary public health, College of Veterinary Medicine, Jeonbuk National University, Iksan, 54596, Republic of Korea

<sup>2</sup> Department of Veterinary Pathology, College of Veterinary Medicine, Jeonbuk National University, Iksan, 54596, Republic of Korea

**\*Corresponding author** : John Hwa Lee, DVM, Ph.D,

E-mail: [johnhlee@jbnu.ac.kr](mailto:johnhlee@jbnu.ac.kr). Phone : +82-63-850-0940

**Supplementary table S1. Experiment Schedule for SFTSV challenge**

| Group<br>(n=8) | Strain  | Route | Dosage<br>( CFU/100 µl) | Booster             | AAV/hDC-<br>SIGN<br>transduction  | Challenge          | i.v:<br>intravenous<br>route, i.p: |
|----------------|---------|-------|-------------------------|---------------------|-----------------------------------|--------------------|------------------------------------|
| A              | PBS     | IM    | 100 ul                  | 100 ul              | 1 week post                       | 1×10 <sup>3</sup>  |                                    |
| B              | JOL2420 | IM    | 1 x 10 <sup>7</sup>     | 1 x 10 <sup>7</sup> | booster                           | FAID <sub>50</sub> |                                    |
| C              | JOL2424 | IM    | 1 x 10 <sup>7</sup>     | 1 x 10 <sup>7</sup> | immunization                      | SFTSV              |                                    |
| D              | JOL2425 | IM    | 1 x 10 <sup>7</sup>     | 1 x 10 <sup>7</sup> | (1 x 10 <sup>11</sup> vp,<br>i.v) | (i.p)              |                                    |
| E              | JOL2426 | IM    | 1 x 10 <sup>7</sup>     | 1 x 10 <sup>7</sup> |                                   |                    |                                    |

intraperitoneal route

**Supplementary table S2. Post-challenge body temperature measurements (°C)**

|               | <b>JOL2420</b> | <b>JOL2424</b> | <b>JOL2425</b> | <b>JOL2426</b> |
|---------------|----------------|----------------|----------------|----------------|
| <b>Day 01</b> | 36.4±0.2       | 36.2±0.1       | 36.6±0.2       | 36.6±0.1       |
| <b>Day 02</b> | 37.4±0.1       | 37.3±0.3       | 36.6±0.2       | 36.7±0.2       |
| <b>Day 03</b> | 37.0±0.5       | 36.9±0.3       | 36.2±0.1       | 36.5±0.4       |
| <b>Day 04</b> | 36.9±0.1       | 36.8±0.1       | 36.6±0.2       | 36.7±0.1       |

# Supplemental Figure S1

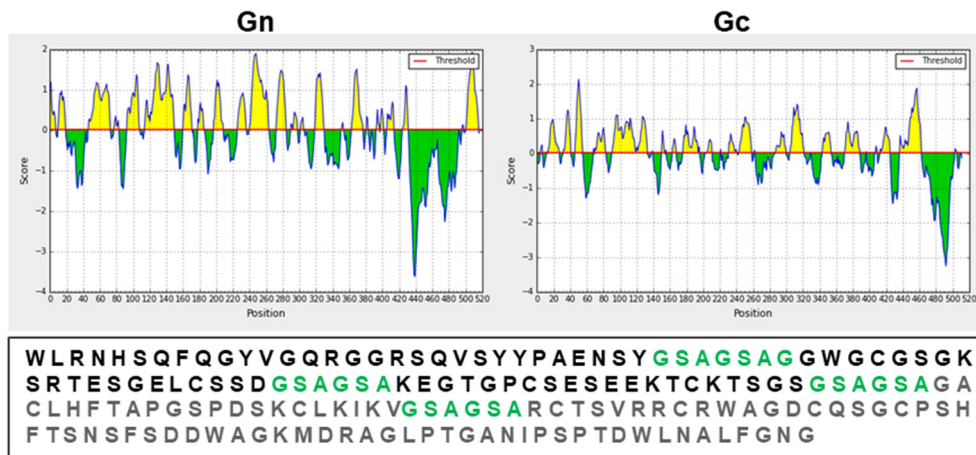

**Supplemental Figure S1.** The BepiPred program automatically determined the cut-off value for linear B-cell epitopes of the Gn-Gc protein.

**Supplemental Figure S2**

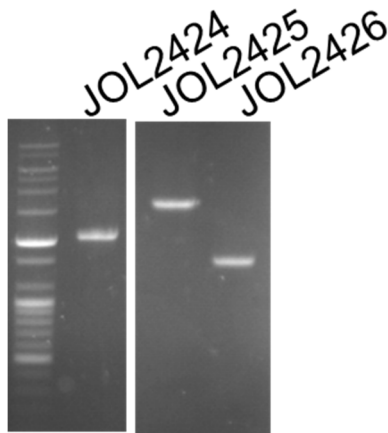

**Supplemental Figure S2.** Vaccine antigens expressed by *Salmonella* mutant, JOL2500 was confirmed by PCR using antigen-specific primers. Genes were amplified at 2.1 kilobase pairs (kbp), 4.1 kbp, and 1.6 kbp for NP-Gn/Gc-epitope, NP-P2A-Gn/Gc, NSs genes, respectively.
